# Supplementary material for: Evaluation of Mean Percentage of Full-Length SMN Transcripts as a Molecular Biomarker of Spinal Muscular Atrophy
Source: MDPI journal article supplement (doi:10.3390/genes13101911), 2022-10-20
Supplement: s1 [file s1]

**Contents**

**Figure S1.** Distribution of *SMN2* gene copy number between studied cohorts.....3

**Figure S2.** Relative level of FL-SMN transcripts determined by semiquantitative and quantitative fluorescence RT-PCR-based methods.....4

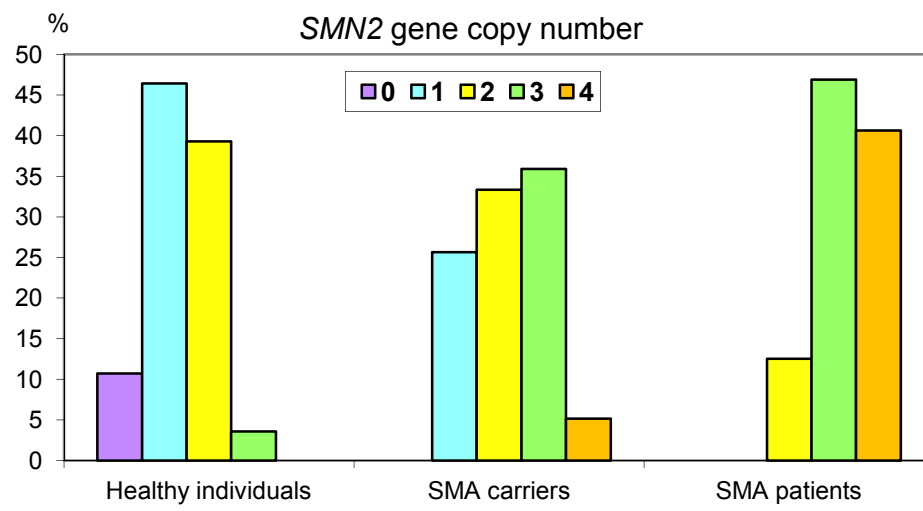

**Figure S1.** Distribution of *SMN2* gene copy number between studied cohorts.

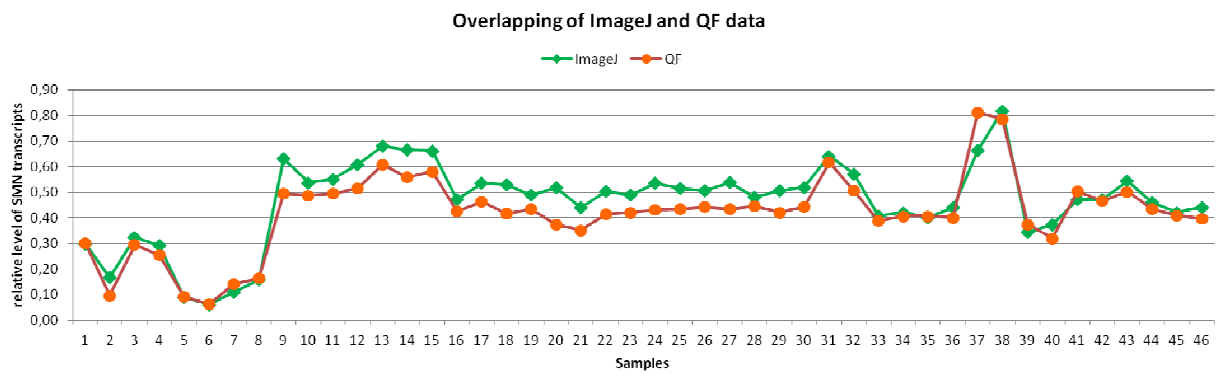

(a)

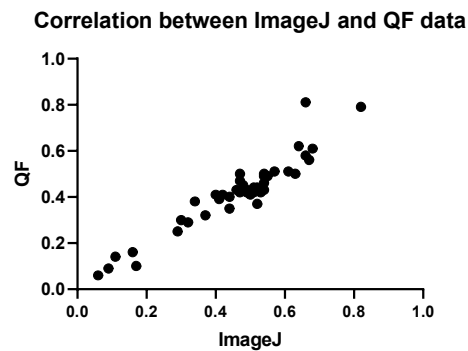

(b)

**Figure S2.** Relative level of FL-SMN transcripts determined by semiquantitative (ImageJ) and quantitative fluorescence (QF) RT-PCR-based methods. **(a)** – typical overlapping of data generated by both methods; **(b)** – correlation analysis between both methods.
